# Supplementary material for: Serine-Aspartate Repeat Protein D Increases Staphylococcus aureus Virulence and Survival in Blood
Source: PubMed Central journal article supplement (PMC5203653; doi:10.1128/iai.00559-16), 2016-12-29

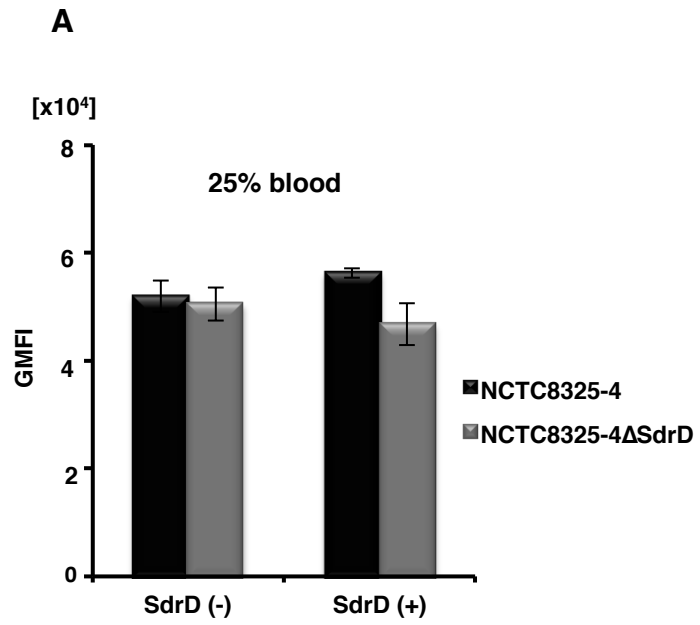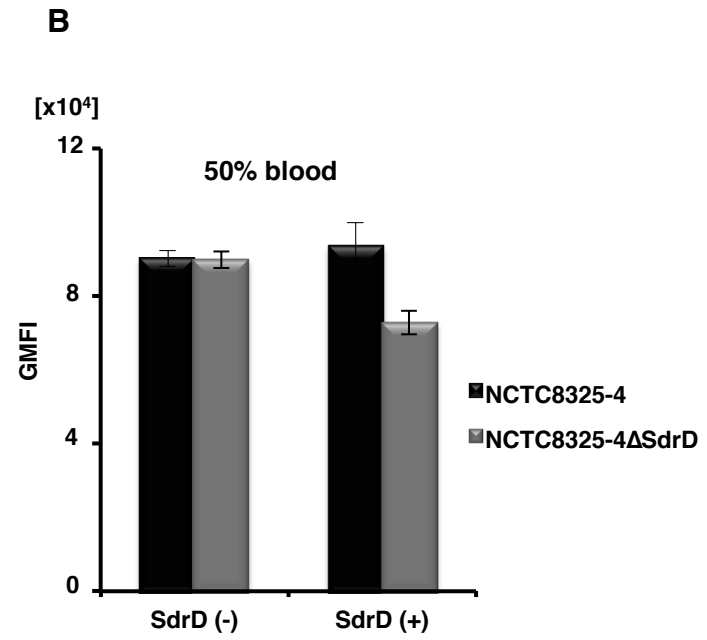

Supplement: IAI.00559-16_zii999091922s2.pdf [file IAI.00559-16_zii999091922s2.pdf]
