# Supplementary material for: Serine-Aspartate Repeat Protein D Increases Staphylococcus aureus Virulence and Survival in Blood
Source: PubMed Central journal article supplement (PMC5203653; doi:10.1128/iai.00559-16), 2016-12-29
Supplement: IAI.00559-16_zii999091922s3.pdf [file IAI.00559-16_zii999091922s3.pdf]

**Supplementary Figure 1. *S. aureus* growth in different experimental conditions. (A)**

Growth curves of *S. aureus* NCTC8325-4 and its isogenic mutant NCTC8325-4 $\Delta$ sdrD in RPMI/HSA and RPMI/THB. Data represents means  $\pm$  SEM of three independent experiments. **(B)** NCTC8325-4 and NCTC8325-4 $\Delta$ sdrD were inoculated in RPMI/HSA containing 10% pooled hirudin plasma. Bacterial numbers were enumerated at different time points by serial dilution plating. Data represents means  $\pm$  SEM of an individual experiment performed in triplicate.

**Supplementary Figure 2. SdrD does not affect whole blood phagocytosis. *S. aureus***

NCTC8325-4 and its mutants NCTC8325-4 $\Delta$ sdrD were labeled with FITC, and 40  $\mu$ l of inoculum ( $\sim 1 \times 10^7$  CFU/ml) were incubated with 25% **(A)** or 50% human blood **(B)**. Data represents geometric mean of the fluorescence intensity (GMFI)  $\pm$  SEM of an individual experiment performed in triplicate.
